# Supplementary material for: Therapeutic resistance in acute myeloid leukemia cells is mediated by a novel ATM/mTOR pathway regulating oxidative phosphorylation
Source: eLife journal article supplement (doi:10.7554/elife.79940), 2022-10-19
Supplement: supp [file elife-79940-supp-v1.zip]

**Figure 2- figure supplement 4**

| Top10 pathways- HALLMARK<br>Vehicle-treated mice<br>Spleen vs. Bone marrow | p-adj   | NES      |
|----------------------------------------------------------------------------|---------|----------|
| *HALLMARK_OXIDATIVE_PHOSPHORYLATION                                        | 0.00482 | -1.70337 |
| HALLMARK_CHOLESTEROL_HOMEOSTASIS                                           | 0.03956 | -1.67506 |
| *HALLMARK_MITOTIC_SPINDLE                                                  | 0.00482 | 2.44152  |
| *HALLMARK_UV_RESPONSE_DN                                                   | 0.00482 | 1.76716  |
| *HALLMARK_G2M_CHECKPOINT                                                   | 0.00482 | 1.68288  |
| *HALLMARK_NOTCH_SIGNALING                                                  | 0.03956 | 1.77514  |
| HALLMARK_E2F_TARGETS                                                       | 0.03956 | 1.41857  |
| HALLMARK_PROTEIN_SECRETION                                                 | 0.08533 | 1.45851  |
| *HALLMARK_APICAL_JUNCTION                                                  | 0.09197 | 1.40337  |
| HALLMARK_TNFA_SIGNALING_VIA_NFKB                                           | 0.09354 | 1.36889  |
