# Supplementary material for: Therapeutic resistance in acute myeloid leukemia cells is mediated by a novel ATM/mTOR pathway regulating oxidative phosphorylation
Source: eLife. 2022 Oct 19;11:e79940. doi: 10.7554/eLife.79940 (PMC9645811; doi:10.7554/eLife.79940)
Supplement: Supplementary file 1. — Quantification data with statistical analyses including mean and standard deviation from each experiment (n = 2–3) is shown. [file elife-79940-supp1.xlsx]

## Sheet: Fig.1C
	Replicate	RPMI	RPMI	hBMSC-CM	hBMSC-CM			All combined	RPMI	RPMI	hBMSC-CM	hBMSC-CM
	1	Veh	Quiz	Veh	Quiz			Average	Veh	Quiz	Veh	Quiz
	pFLT3 (Y593)/ Tubulin	1	0.032	0.875	0.062			pFLT3 (Y593)/ Tubulin	1	0.094	0.812	0.087
	FLT3/ Tubulin	1	1.602	0.81	2.725			FLT3/ Tubulin	1	1.6625	0.7855	2.6315
	Replicate	RPMI	RPMI	hBMSC-CM	hBMSC-CM
	2	Veh	Quiz	Veh	Quiz			All combined	RPMI	RPMI	hBMSC-CM	hBMSC-CM
	pFLT3 (Y593)/ Tubulin	1	0.156	0.749	0.112			Standard deviation	Veh	Quiz	Veh	Quiz
	FLT3/ Tubulin	1	1.723	0.761	2.538			pFLT3 (Y593)/ Tubulin	0	0.0876812	0.0890955	0.0353553
								FLT3/ Tubulin	0	0.0855599	0.0346482	0.132229

## Sheet: Fig. 2D
	Replicate	RPMI	RPMI	RPMI	RPMI	RPMI	hBMSC-CM	hBMSC-CM	hBMSC-CM	hBMSC-CM	hBMSC-CM			All combined	RPMI	RPMI	RPMI	RPMI	RPMI	hBMSC-CM	hBMSC-CM	hBMSC-CM	hBMSC-CM	hBMSC-CM
	1	Veh	Quiz	Quiz	Quiz	Quiz	Veh	Quiz	Quiz	Quiz	Quiz			Average	Veh	Quiz	Quiz	Quiz	Quiz	Veh	Quiz	Quiz	Quiz	Quiz
			3hr	6hr	10hr	15hr		3hr	6hr	10hr	15hr					3hr	6hr	10hr	15hr		3hr	6hr	10hr	15hr
	p-mTOR (s2448)/H3	1	0.0612	0.081	0.087	0.071	2.142	1.633	1.725	1.823	1.452			p-mTOR (s2448)/H3	1	0.0824	0.121	0.132667	0.124	2.33067	1.53733	1.612	1.71833	1.55167
	mTOR/H3	1	0.712	1.176	1.237	1.171	1.314	1.691	1.492	1.622	1.242			mTOR/H3	1	0.891	1.146	1.26333	1.21233	1.242	1.62433	1.524	1.42133	1.22567
	p-S6 (s240/s244)/H3	1	0.021	0.031	0.021	0.071	1.452	0.404	0.441	0.315	0.441			p-S6 (s240/s244)/H3	1	0.0423333	0.0216667	0.031	0.152333	1.31233	0.311	0.355667	0.412333	0.480667
	S6/H3	1	1.18	0.982	1.358	0.881	1.167	1.231	1.196	1.266	1.291			S6/H3	1	1.21267	1.12333	1.19233	0.851667	1.31333	1.23067	1.33133	1.27533	1.396
	p-4E-BP1 (s65)/H3	1	0.216	0.081	0.077	0.066	1.442	0.486	0.666	0.522	0.442			p-4E-BP1 (s65)/H3	1	0.313667	0.188	0.0623333	0.0576667	1.2965	0.371	0.518333	0.502	0.488333
	4E-BP1/H3	1	1.132	0.931	0.912	1.362	1.245	1.113	1.321	0.998	1.32			4E-BP1/H3	1	1.15167	1.105	0.891333	1.25967	1.23067	0.949333	1.181	1.038	1.248
	c-MYC/H3	1	0.214	0.277	0.145	0.316	2.441	0.441	0.281	0.678	0.791			c-MYC/H3	1	0.274	0.2	0.14	0.223	1.925	0.447	0.385	0.609333	0.654667
	Replicate	RPMI	RPMI	RPMI	RPMI	RPMI	hBMSC-CM	hBMSC-CM	hBMSC-CM	hBMSC-CM	hBMSC-CM
	2	Veh	Quiz	Quiz	Quiz	Quiz	Veh	Quiz	Quiz	Quiz	Quiz			All combined	RPMI	RPMI	RPMI	RPMI	RPMI	hBMSC-CM	hBMSC-CM	hBMSC-CM	hBMSC-CM	hBMSC-CM
			3hr	6hr	10hr	15hr		3hr	6hr	10hr	15hr			Standard deviation	Veh	Quiz	Quiz	Quiz	Quiz	Veh	Quiz	Quiz	Quiz	Quiz
	p-mTOR (s2448)/H3	1	0.113	0.229	0.19	0.212	2.512	1.734	1.512	1.671	1.661					3hr	6hr	10hr	15hr		3hr	6hr	10hr	15hr
	mTOR/H3	1	1.123	1.281	1.314	1.295	1.451	1.43	1.612	1.331	1.118			p-mTOR (s2448)/H3	0	0.0271492	0.0945727	0.0524817	0.0767398	0.185109	0.258156	0.107093	0.0907818	0.104835
	p-S6 (s240/s244)/H3	1	0.094	0.021	0.041	0.354	1.621	0.331	0.352	0.487	0.602			mTOR/H3	0	0.210564	0.152233	0.04389	0.0715914	0.25281	0.171039	0.0771492	0.17407	0.1005
	S6/H3	1	1.332	1.244	0.998	1.023	1.391	1.165	1.422	1.299	1.485			p-S6 (s240/s244)/H3	0	0.0449704	0.0090185	0.01	0.175734	0.397357	0.104446	0.0835604	0.0882119	0.107156
	p-4E-BP1 (s65)/H3	1	0.364	0.298	0.067	0.038	1.1255	0.312	0.687	0.513	0.499			S6/H3	0	0.106814	0.132217	0.181704	0.187727	0.126808	0.0655006	0.119438	0.0206478	0.0979847
	4E-BP1/H3	1	0.995	1.161	0.861	1.192	1.115	0.912	1.256	0.789	1.244			p-4E-BP1 (s65)/H3	0	0.0845951	0.108531	0.0174738	0.0170978	0.159783	0.0996042	0.274154	0.0272213	0.0420278
	c-MYC/H3	1	0.331	0.134	0.177	0.142	1.782	0.512	0.499	0.661	0.512			4E-BP1/H3	0	0.167369	0.153844	0.026839	0.0901462	0.109208	0.148561	0.189011	0.271221	0.0700857
	Replicate	RPMI	RPMI	RPMI	RPMI	RPMI	hBMSC-CM	hBMSC-CM	hBMSC-CM	hBMSC-CM	hBMSC-CM			c-MYC/H3	0	0.0585577	0.0721318	0.0397366	0.0876185	0.461429	0.0622174	0.109343	0.104558	0.139608
	3	Veh	Quiz	Quiz	Quiz	Quiz	Veh	Quiz	Quiz	Quiz	Quiz
			3hr	6hr	10hr	15hr		3hr	6hr	10hr	15hr
	p-mTOR (s2448)/H3	1	0.073	0.053	0.121	0.089	2.338	1.245	1.599	1.661	1.542
	mTOR/H3	1	0.838	0.981	1.239	1.171	0.961	1.752	1.468	1.311	1.317
	p-S6 (s240/s244)/H3	1	0.012	0.013	0.031	0.032	0.864	0.198	0.274	0.435	0.399
	S6/H3	1	1.126	1.144	1.221	0.651	1.382	1.296	1.376	1.261	1.412
	p-4E-BP1 (s65)/H3	1	0.361	0.185	0.043	0.069	1.322	0.315	0.202	0.471	0.524
	4E-BP1/H3	1	1.328	1.223	0.901	1.225	1.332	0.823	0.966	1.327	1.18
	c-MYC/H3	1	0.277	0.189	0.098	0.211	1.552	0.388	0.375	0.489	0.661

## Sheet: Fig. 4B
	Replicate	RPMI	RPMI	hBMSC-CM	hBMSC-CM	hBMSC-CM	hBMSC-CM			All combined	RPMI	RPMI	hBMSC-CM	hBMSC-CM	hBMSC-CM	hBMSC-CM
	1	Veh	Quiz	Veh	Quiz	EVR	Combo			Average	Veh	Quiz	Veh	Quiz	EVR	Combo
	p-mTOR (s2448)/H3	1	0.122	1.477	0.729	0.412	0.211			p-mTOR (s2448)/H3	1	0.197333	1.35567	0.659	0.567333	0.237
	mTOR/H3	1	0.798	1.512	0.915	0.815	0.778			mTOR/H3	1	0.767667	1.34333	0.986333	0.861667	0.799
	p-S6 (s240/s244)/H3	1	0.215	1.715	0.617	0.103	0.051			p-S6 (s240/s244)/H3	1	0.274333	1.37433	0.506333	0.136333	0.0753333
	p-4E-BP1 (s65)/H3	1	0.032	1.734	0.587	0.406	0.017			p-4E-BP1 (s65)/H3	1	0.076	1.41233	0.481333	0.496333	0.0866667
	p-4E-BP1 (T37/46)/H3	1	0.152	1.969	0.398	0.667	0.277			p-4E-BP1 (T37/46)/H3	1	0.182333	1.884	0.301333	0.641	0.246
	Replicate	RPMI	RPMI	hBMSC-CM	hBMSC-CM	hBMSC-CM	hBMSC-CM
	2	Veh	Quiz	Veh	Quiz	EVR	Combo			All combined	RPMI	RPMI	hBMSC-CM	hBMSC-CM	hBMSC-CM	hBMSC-CM
	p-mTOR (s2448)/H3	1	0.221	0.892	0.688	0.665	0.264			Standard deviation	Veh	Quiz	Veh	Quiz	EVR	Combo
	mTOR/H3	1	0.651	1.223	1.125	1.069	0.784			p-mTOR (s2448)/H3	0	0.0667258	0.416474	0.0881533	0.308328	0.0265141
	p-S6 (s240/s244)/H3	1	0.196	1.216	0.311	0.121	0.134			mTOR/H3	0	0.104844	0.15044	0.120106	#REF!	0.0313209
	p-4E-BP1 (s65)/H3	1	0.115	1.162	0.372	0.577	0.175			p-S6 (s240/s244)/H3	0	0.119601	0.29527	0.169662	0.0430968	0.0510523
	p-4E-BP1 (T37/46)/H3	1	0.231	1.615	0.241	0.612	0.211			p-4E-BP1 (s65)/H3	0	0.0417253	0.292596	0.107547	0.0859089	0.080637
	Replicate	RPMI	RPMI	hBMSC-CM	hBMSC-CM	hBMSC-CM	hBMSC-CM			p-4E-BP1 (T37/46)/H3	0	0.0425715	0.238162	0.0845715	0.0276225	0.0331813
	3	Veh	Quiz	Veh	Quiz	EVR	Combo
	p-mTOR (s2448)/H3	1	0.249	1.698	0.56	0.222	0.236
	mTOR/H3	1	0.854	1.295	0.919	0.701	0.835
	p-S6 (s240/s244)/H3	1	0.412	1.192	0.591	0.185	0.041
	p-4E-BP1 (s65)/H3	1	0.081	1.341	0.485	0.506	0.068
	p-4E-BP1 (T37/46)/H3	1	0.164	2.068	0.265	0.644	0.25

## Sheet: Fig. 7A
	Replicate	RPMI	RPMI	hBMSC-CM	hBMSC-CM	hBMSC-CM	hBMSC-CM			All combined	RPMI	RPMI	hBMSC-CM	hBMSC-CM	hBMSC-CM	hBMSC-CM
	1	Veh	Quiz	Veh	Quiz	EVR	Combo			Average	Veh	Quiz	Veh	Quiz	EVR	Combo
	ATM/H3	1	0.725	1.245	0.988	1.025	0.811			ATM/H3	1	0.732667	1.20633	0.985	1.163	0.739333
	p-ATM (s1981)/H3 upper band 350KDa	1	0.412	1.224	1.377	2.751	0.815			p-ATM (s1981)/H3 upper band 350KDa	1	0.483667	1.51433	1.312	2.045	1.077
	p-ATM (s1981)/H3 lower band 250KDa	1	14.612	0.391	4.152	1.456	8.113			p-ATM (s1981)/H3 lower band 250KDa	1	10.331	0.598	2.41167	1.23433	4.724
	Replicate	RPMI	RPMI	hBMSC-CM	hBMSC-CM	hBMSC-CM	hBMSC-CM
	2	Veh	Quiz	Veh	Quiz	EVR	Combo			All combined	RPMI	RPMI	hBMSC-CM	hBMSC-CM	hBMSC-CM	hBMSC-CM
	ATM/H3	1	0.861	0.986	1.156	0.876	0.724			Standard deviation	Veh	Quiz	Veh	Quiz	EVR	Combo
	p-ATM (s1981)/H3 upper band 350KDa	1	0.651	1.623	0.938	1.602	1.124			ATM/H3	0	0.124677	0.20377	0.17252	0.375525	0.0653631
	p-ATM (s1981)/H3 lower band 250KDa	1	5.713	0.912	1.462	0.934	3.797			p-ATM (s1981)/H3 upper band 350KDa	0	0.145411	0.254072	0.346108	0.618002	0.241948
	Replicate	RPMI	RPMI	hBMSC-CM	hBMSC-CM	hBMSC-CM	hBMSC-CM			p-ATM (s1981)/H3 lower band 250KDa	0	4.45906	0.276491	1.50927	0.269745	3.03365
	3	Veh	Quiz	Veh	Quiz	EVR	Combo
	ATM/H3	1	0.612	1.388	0.811	1.588	0.683
	p-ATM (s1981)/H3 upper band 350KDa	1	0.388	1.696	1.621	1.782	1.292
	p-ATM (s1981)/H3 lower band 250KDa	1	10.668	0.491	1.621	1.313	2.262

## Sheet: Fig. 7C
	Replicate	shNT	shNT	shNT	shNT	shATM	shATM	shATM	shATM			Replicate	shNT	shNT	shNT	shNT	shATM	shATM	shATM	shATM
	1	RPMI	RPMI	hBMSC-CM	hBMSC-CM	RPMI	RPMI	hBMSC-CM	hBMSC-CM			Average	RPMI	RPMI	hBMSC-CM	hBMSC-CM	RPMI	RPMI	hBMSC-CM	hBMSC-CM
		Veh	Quiz	Veh	Quiz	Veh	Quiz	Veh	Quiz				Veh	Quiz	Veh	Quiz	Veh	Quiz	Veh	Quiz
	ATM/H3	1	0.821	2.326	1.263	0.012	0.014	0.011	0.012			ATM/H3	1	0.969	2.05333	1.182	0.0433333	0.0386667	0.049	0.0933333
	mTOR/H3	1	1.172	2.216	1.756	0.026	0.042	0.115	0.133			mTOR/H3	1	1.15867	2.436	2.111	0.108333	0.103333	0.163667	0.162
	p-mTOR (s2448)/H3	1	0.011	2.467	0.881	0.044	0.013	0.022	0.033			p-mTOR (s2448)/H3	1	0.0213333	2.145	0.791667	0.0593333	0.036	0.041	0.031
	AKT/H3	1	1.248	1.662	1.211	0.466	0.211	0.589	0.515			AKT/H3	1	0.966667	1.259	1.162	0.541	0.283667	0.616667	0.542333
	p-AKT (s473)/H3	1	0.284	2.898	0.615	2.117	0.172	1.872	0.287			p-AKT (s473)/H3	1	0.319333	2.596	0.638667	2.04667	0.217	1.715	0.271333
	p-H2AX (s139)/H3	1	6.156	0.517	1.006	1.381	8.848	0.694	0.571			p-H2AX (s139)/H3	1	5.652	0.673667	1.21	1.24033	7.99133	0.596	0.554667
	p-4E-BP1 (T37/46)/H3	1	0.343	2.354	1.422	1.966	0.213	1.604	0.361			p-4E-BP1 (T37/46)/H3	1	0.342333	2.11533	1.31233	1.81533	0.279	1.41233	0.414667
	p-4E-BP1 (s65)/H3	1	0.121	2.393	0.53	2.456	0.222	1.864	0.232			p-4E-BP1 (s65)/H3	1	0.141333	2.23433	0.810333	2.15533	0.212	1.92033	0.254
	p-S6 (s240/s244)/H3	1	0.292	2.531	0.752	1.336	0.267	1.332	0.211			p-S6 (s240/s244)/H3	1	0.248667	2.41167	0.780667	1.231	0.210667	1.12333	0.192
	Replicate	shNT	shNT	shNT	shNT	shATM	shATM	shATM	shATM
	2	RPMI	RPMI	hBMSC-CM	hBMSC-CM	RPMI	RPMI	hBMSC-CM	hBMSC-CM			Replicate	shNT	shNT	shNT	shNT	shATM	shATM	shATM	shATM
		Veh	Quiz	Veh	Quiz	Veh	Quiz	Veh	Quiz			Standard deviation	RPMI	RPMI	hBMSC-CM	hBMSC-CM	RPMI	RPMI	hBMSC-CM	hBMSC-CM
	ATM/H3	1	1.163	1.623	1.331	0.102	0.085	0.072	0.124				Veh	Quiz	Veh	Quiz	Veh	Quiz	Veh	Quiz
	mTOR/H3	1	1.316	2.596	2.481	0.216	0.155	0.19	0.169			ATM/H3	0	0.175579	0.377089	0.202067	0.0508462	0.0401539	0.0331512	0.071143
	p-mTOR (s2448)/H3	1	0.039	1.884	0.671	0.072	0.054	0.058	0.018			mTOR/H3	0	0.164406	0.196977	0.362733	0.0975004	0.0357631	0.042194	0.0262107
	AKT/H3	1	0.923	1.152	1.086	0.619	0.365	0.717	0.602			p-mTOR (s2448)/H3	0	0.0153731	0.296248	0.278462	0.0141892	0.0209523	0.0180831	0.0121244
	p-AKT (s473)/H3	1	0.396	2.191	0.712	1.812	0.284	1.568	0.261			AKT/H3	0	0.262241	0.361576	0.0667308	0.0765441	0.0773649	0.0897571	0.0517333
	p-H2AX (s139)/H3	1	5.112	0.876	1.462	1.122	6.892	0.462	0.674			p-AKT (s473)/H3	0	0.066463	0.364581	0.0648254	0.208591	0.0591523	0.152247	0.0137961
	p-4E-BP1 (T37/46)/H3	1	0.412	2.066	1.226	1.658	0.332	1.241	0.502			p-H2AX (s139)/H3	0	0.52293	0.183805	0.231758	0.130936	1.00032	0.120117	0.128282
	p-4E-BP1 (s65)/H3	1	0.197	1.993	1.163	1.899	0.307	2.115	0.358			p-4E-BP1 (T37/46)/H3	0	0.0700024	0.218223	0.100062	0.154108	0.0605558	0.182352	0.0762911
	p-S6 (s240/s244)/H3	1	0.231	2.402	0.788	1.116	0.167	1.022	0.174			p-4E-BP1 (s65)/H3	0	0.0487887	0.212427	#REF!	0.281134	0.100374	0.1735	0.0949316
	Replicate	shNT	shNT	shNT	shNT	shATM	shATM	shATM	shATM			p-S6 (s240/s244)/H3	0	0.0377403	0.114806	0.0257941	0.11034	0.0511892	0.180736	0.0120208
	3	RPMI	RPMI	hBMSC-CM	hBMSC-CM	RPMI	RPMI	hBMSC-CM	hBMSC-CM
		Veh	Quiz	Veh	Quiz	Veh	Quiz	Veh	Quiz
	ATM/H3	1	0.923	2.211	0.952	0.016	0.017	0.064	0.144
	mTOR/H3	1	0.988	2.496	2.096	0.083	0.113	0.186	0.184
	p-mTOR (s2448)/H3	1	0.014	2.084	0.823	0.062	0.041	0.043	0.042
	AKT/H3	1	0.729	0.963	1.189	0.538	0.275	0.544	0.51
	p-AKT (s473)/H3	1	0.278	2.699	0.589	2.211	0.195	1.705	0.266
	p-H2AX (s139)/H3	1	5.688	0.628	1.162	1.218	8.234	0.632	0.419
	p-4E-BP1 (T37/46)/H3	1	0.272	1.926	1.289	1.822	0.292	1.392	0.381
	p-4E-BP1 (s65)/H3	1	0.106	2.317	0.738	2.111	0.107	1.782	0.172
	p-S6 (s240/s244)/H3	1	0.223	2.302	0.802	1.241	0.198	1.016	0.191

## Sheet: Fig. S2A
	Replicate	RPMI	RPMI	RPMI	RPMI	RPMI	hBMSC-CM	hBMSC-CM	hBMSC-CM	hBMSC-CM	hBMSC-CM			Replicate	RPMI	RPMI	RPMI	RPMI	RPMI	hBMSC-CM	hBMSC-CM	hBMSC-CM	hBMSC-CM	hBMSC-CM
	1	Veh	Quiz	Quiz	Quiz	Quiz	Veh	Quiz	Quiz	Quiz	Quiz			Average	Veh	Quiz	Quiz	Quiz	Quiz	Veh	Quiz	Quiz	Quiz	Quiz
			3hr	6hr	10hr	15hr		3hr	6hr	10hr	15hr					3hr	6hr	10hr	15hr		3hr	6hr	10hr	15hr
	p-mTOR (s2448)/H3	1	0.031	0.252	0.172	0.132	2.118	1.827	1.765	2.231	1.752			p-mTOR (s2448)/H3	1	0.058	0.121333	0.115333	0.085	2.00867	1.51	1.663	1.80533	1.62367
	mTOR/H3	1	1.152	1.857	1.672	1.521	2.332	2.115	2.423	2.412	1.877			mTOR/H3	1	0.978333	1.266	1.17033	1.23467	2.018	1.84833	2.05167	2.21467	1.785
	p-S6 (s240/s244)/H3	1	0.727	0.822	0.231	0.171	1.091	0.981	0.817	0.314	0.411			p-S6 (s240/s244)/H3	1	0.635333	0.511667	0.279333	0.242333	1.22167	0.951667	0.788	0.719333	0.611667
	S6/H3	1	0.881	1.321	1.124	1.211	0.981	1.213	1.154	1.342	1.297			S6/H3	1	0.972333	1.08367	1.044	0.996	0.999	1.218	1.05267	1.183	1.20433
	c-MYC/H3	1	0.131	0.083	0.123	0.055	1.152	0.231	0.172	0.297	0.371			c-MYC/H3	1	0.193333	0.105	0.0776667	0.096	1.26333	0.27	0.241	0.295333	0.315667
	Replicate	RPMI	RPMI	RPMI	RPMI	RPMI	hBMSC-CM	hBMSC-CM	hBMSC-CM	hBMSC-CM	hBMSC-CM
	2	Veh	Quiz	Quiz	Quiz	Quiz	Veh	Quiz	Quiz	Quiz	Quiz			Replicate	RPMI	RPMI	RPMI	RPMI	RPMI	hBMSC-CM	hBMSC-CM	hBMSC-CM	hBMSC-CM	hBMSC-CM
			3hr	6hr	10hr	15hr		3hr	6hr	10hr	15hr			Standard deviation	Veh	Quiz	Quiz	Quiz	Quiz	Veh	Quiz	Quiz	Quiz	Quiz
	p-mTOR (s2448)/H3	1	0.011	0.031	0.112	0.079	1.892	1.241	1.562	1.662	1.452					3hr	6hr	10hr	15hr		3hr	6hr	10hr	15hr
	mTOR/H3	1	0.891	1.152	0.924	1.265	1.986	1.873	1.772	2.116	1.892			p-mTOR (s2448)/H3	0	0.0648614	0.115889	0.0550757	0.0443058	0.113178	0.295934	0.101504	0.375132	0.154623
	p-S6 (s240/s244)/H3	1	0.456	0.361	0.165	0.221	1.352	1.112	0.859	1.162	0.772			mTOR/H3	0	0.150401	0.54305	0.434479	0.302642	0.299286	0.279817	0.335041	0.170896	0.172502
	S6/H3	1	1.051	0.778	0.893	1.002	1.125	1.227	0.891	1.225	0.985			p-S6 (s240/s244)/H3	0	0.15532	0.268794	0.144687	0.0840555	0.1305	0.176834	0.0891123	0.425231	0.183849
	c-MYC/H3	1	0.225	0.116	0.085	0.109	1.422	0.345	0.189	0.257	0.285			S6/H3	0	0.0857049	0.277875	0.130847	0.218062	0.118034	0.00781025	0.1415	0.183638	0.190707
	Replicate	RPMI	RPMI	RPMI	RPMI	RPMI	hBMSC-CM	hBMSC-CM	hBMSC-CM	hBMSC-CM	hBMSC-CM			c-MYC/H3	0	0.0539846	0.0190526	0.0494099	0.0362905	0.141086	0.0649692	0.105133	0.0375278	0.0480139
	3	Veh	Quiz	Quiz	Quiz	Quiz	Veh	Quiz	Quiz	Quiz	Quiz
			3hr	6hr	10hr	15hr		3hr	6hr	10hr	15hr
	p-mTOR (s2448)/H3	1	0.132	0.081	0.062	0.044	2.016	1.462	1.662	1.523	1.667
	mTOR/H3	1	0.892	0.789	0.915	0.918	1.736	1.557	1.96	2.116	1.586
	p-S6 (s240/s244)/H3	1	0.723	0.352	0.442	0.335	1.222	0.762	0.688	0.682	0.652
	S6/H3	1	0.985	1.152	1.115	0.775	0.891	1.214	1.113	0.982	1.331
	c-MYC/H3	1	0.224	0.116	0.025	0.124	1.216	0.234	0.362	0.332	0.291

## Sheet: Fig. S7A
	Replicate	RPMI	RPMI	RPMI	hBMSC-CM	hBMSC-CM	hBMSC-CM			Replicate	RPMI	RPMI	RPMI	hBMSC-CM	hBMSC-CM	hBMSC-CM
	1	Veh	Quiz	Quiz+Z-VAD	Veh	Quiz	Quiz+Z-VAD			Average	Veh	Quiz	Quiz+Z-VAD	Veh	Quiz	Quiz+Z-VAD
	p-ATM (s1981)/H3 upper band 350KDa	1	0.233	0.538	0.824	0.651	1.724			p-ATM (s1981)/H3 upper band 350KDa	1	0.2155	0.516	0.7815	0.611	1.6335
	p-ATM (s1981)/H3 lower band 250KDa	1	9.342	1.166	0.961	0.667	0.881			p-ATM (s1981)/H3 lower band 250KDa	1	9.163	1.155	0.823	0.724	0.8225
	ATM/H3	1	0.278	0.835	1.1821	0.69	0.872			ATM/H3	1	0.4615	0.8425	1.07205	0.6595	0.862
	p-mTOR (s2448)/H3	1	0.121	0.178	1.252	0.523	0.522			p-mTOR (s2448)/H3	1	0.0845	0.1885	1.19	0.556	0.5115
	mTOR/H3	1	0.367	0.823	0.982	0.955	1.123			mTOR/H3	1	0.3445	0.7375	1.075	0.9355	0.98
	Cleaved caspase-3/H3	1	10.162	0.894	0.862	1.122	0.748			Cleaved caspase-3/H3	1	9.1545	0.8505	0.912	1.051	0.7245
	Replicate	RPMI	RPMI	RPMI	hBMSC-CM	hBMSC-CM	hBMSC-CM
	2	Veh	Quiz	Quiz+Z-VAD	Veh	Quiz	Quiz+Z-VAD			Replicate	RPMI	RPMI	RPMI	hBMSC-CM	hBMSC-CM	hBMSC-CM
	p-ATM (s1981)/H3 upper band 350KDa	1	0.198	0.494	0.739	0.571	1.543			Standard deviation	Veh	Quiz	Quiz+Z-VAD	Veh	Quiz	Quiz+Z-VAD
	p-ATM (s1981)/H3 lower band 250KDa	1	8.984	1.144	0.685	0.781	0.764			p-ATM (s1981)/H3 upper band 350KDa	0	0.0247487	0.0311127	0.0601041	0.0565685	0.127986
	ATM/H3	1	0.645	0.85	0.962	0.629	0.852			p-ATM (s1981)/H3 lower band 250KDa	0	0.253144	0.0155563	0.195161	0.0806102	0.0827315
	p-mTOR (s2448)/H3	1	0.048	0.199	1.128	0.589	0.501			ATM/H3	0	0.259508	0.0106066	0.155634	0.0431335	0.0141421
	mTOR/H3	1	0.322	0.652	1.168	0.916	0.837			p-mTOR (s2448)/H3	0	0.0516188	0.0148492	0.0876812	0.046669	0.0148492
	Cleaved caspase-3/H3	1	8.147	0.807	0.962	0.98	0.701			mTOR/H3	0	0.0318198	0.120915	0.131522	0.0275772	0.202233
										Cleaved caspase-3/H3	0	1.42482	0.0615183	0.0707107	0.100409	0.033234

## Sheet: Fig. S7F
	Replicate	CRIPSPR:NT	CRIPSPR:NT	CRIPSPR:NT	CRIPSPR:NT	CRIPSPR:ATM	CRIPSPR:ATM	CRIPSPR:ATM	CRIPSPR:ATM
	1	RPMI	RPMI	hBMSC-CM	hBMSC-CM	RPMI	RPMI	hBMSC-CM	hBMSC-CM
		Veh	Quiz	Veh	Quiz	Veh	Quiz	Veh	Quiz
	ATM/H3	1	0.721	2.326	1.463	0.012	0.014	0.011	0.012
	mTOR/H3	1	0.862	2.216	1.756	0.026	0.042	0.115	0.133
	p-mTOR (s2448)/H3	1	0.041	2.467	0.881	0.044	0.013	0.022	0.033
	AKT/H3	1	0.767	1.662	1.211	0.466	0.211	0.789	0.515
	p-AKT (s473)/H3	1	0.135	2.898	0.615	0.824	0.172	0.872	0.287
	p-H2AX (s139)/H3	1	4.824	0.517	1.006	1.381	8.848	0.694	0.571
	p-4E-BP1 (T37/46)/H3	1	0.209	2.354	1.422	1.966	0.213	1.604	0.361
	p-S6 (s240/s244)/H3	1	0.292	2.531	0.752	1.336	0.267	1.332	0.211

## Sheet: Fig. S8A
	Replicate	MV4-11	MV4-11	THP1	THP1	OCI-AML3	OCI-AML3			Replicate	MV4-11	MV4-11	THP1	THP1	OCI-AML3	OCI-AML3
	1	shNT	shATM	shNT	shATM	shNT	shATM			Average	shNT	shATM	shNT	shATM	shNT	shATM
	ATM/H3	1	0.338	1	0.417	1	0.498			ATM/H3	1	0.397	1	0.436	1	0.5515
	mTOR/H3	1	0.275	1	0.516	1	0.752			mTOR/H3	1	0.2965	1	0.4975	1	0.7135
	p-mTOR (s2448)/H3	1	0.567	1	0.497	1	0.658			p-mTOR (s2448)/H3	1	0.5185	1	0.499	1	0.7165
	AKT/H3	1	1.218	1	1.041	1	1.162			AKT/H3	1	1.0925	1	0.936	1	0.942
	p-AKT (s473)/H3	1	0.514	1	0.649	1	1.892			p-AKT (s473)/H3	1	0.5265	1	0.742	1	1.5935
	Replicate	MV4-11	MV4-11	THP1	THP1	OCI-AML3	OCI-AML3
	2	shNT	shATM	shNT	shATM	shNT	shATM			Replicate	MV4-11	MV4-11	THP1	THP1	OCI-AML3	OCI-AML3
	ATM/H3	1	0.456	1	0.455	1	0.605			Standard deviation	shNT	shATM	shNT	shATM	shNT	shATM
	mTOR/H3	1	0.318	1	0.479	1	0.675			ATM/H3	0	0.0834386	0	0.0268701	0	0.0756604
	p-mTOR (s2448)/H3	1	0.47	1	0.501	1	0.775			mTOR/H3	0	0.0304056	0	0.026163	0	0.0544472
	AKT/H3	1	0.967	1	0.831	1	0.722			p-mTOR (s2448)/H3	0	0.0685894	0	0.00282843	0	0.0827315
	p-AKT (s473)/H3	1	0.539	1	0.835	1	1.295			AKT/H3	0	0.177484	0	0.148492	0	0.311127
										p-AKT (s473)/H3	0	0.0176777	0	0.131522	0	0.422143
