# Supplementary figures and images for: Therapeutic resistance in acute myeloid leukemia cells is mediated by a novel ATM/mTOR pathway regulating oxidative phosphorylation
Source: eLife journal article supplement (doi:10.7554/elife.79940), 2022-10-19

Figure 6- figure supplement 1

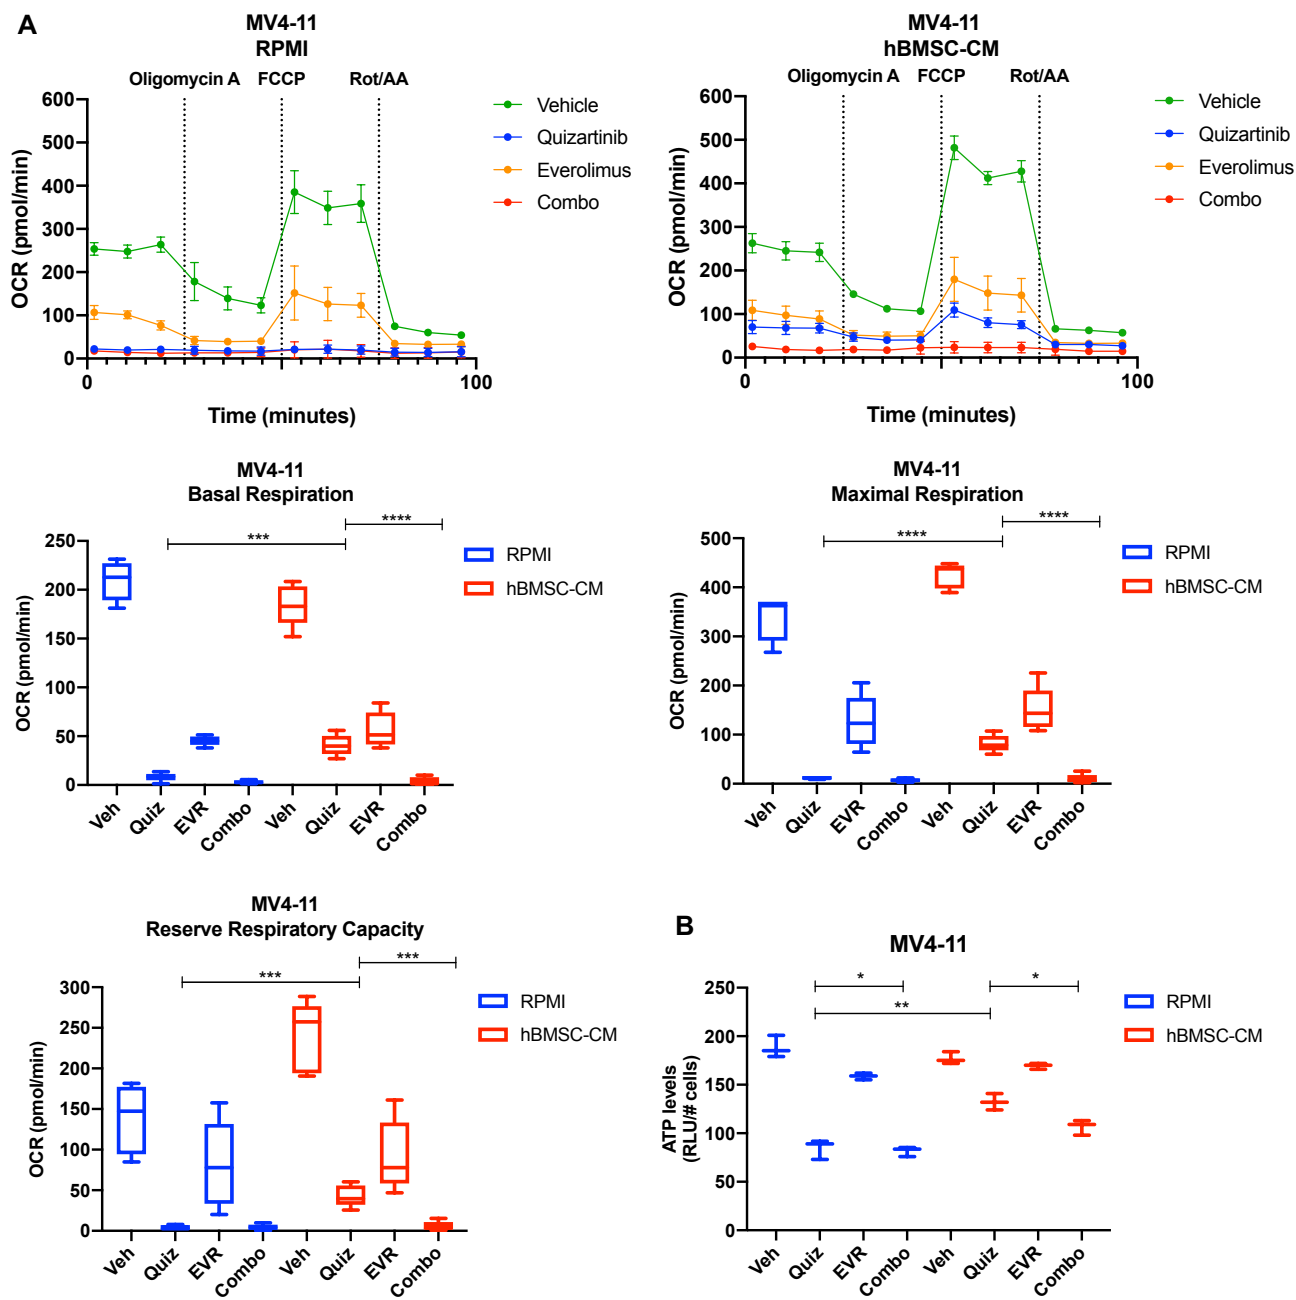

Supplement: supp [file elife-79940-supp-v1.zip]

Figure 7- figure supplement 8

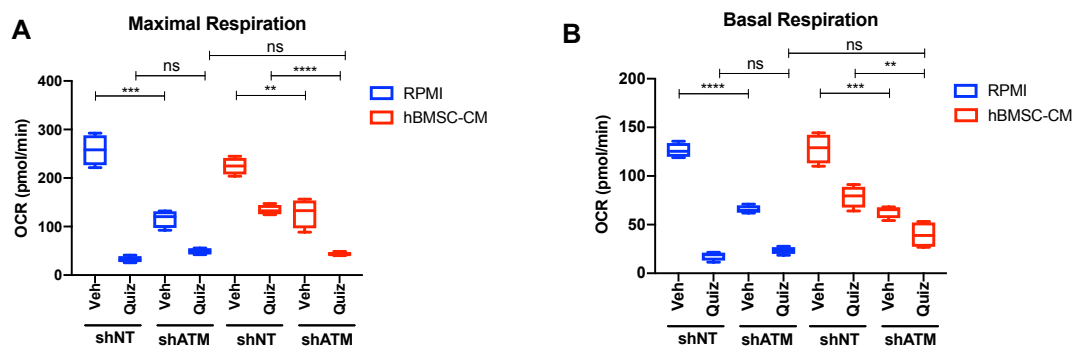

Supplement: supp [file elife-79940-supp-v1.zip]

Figure 5- figure supplement 1

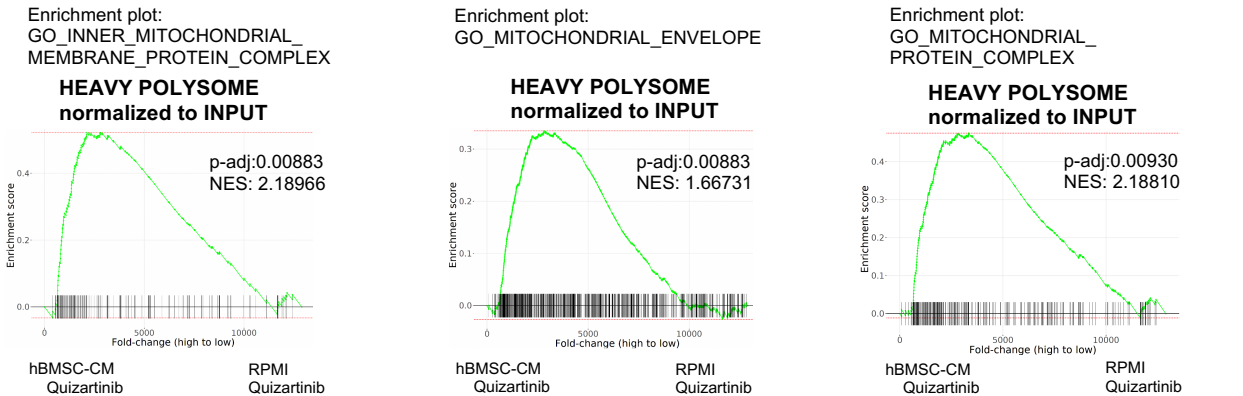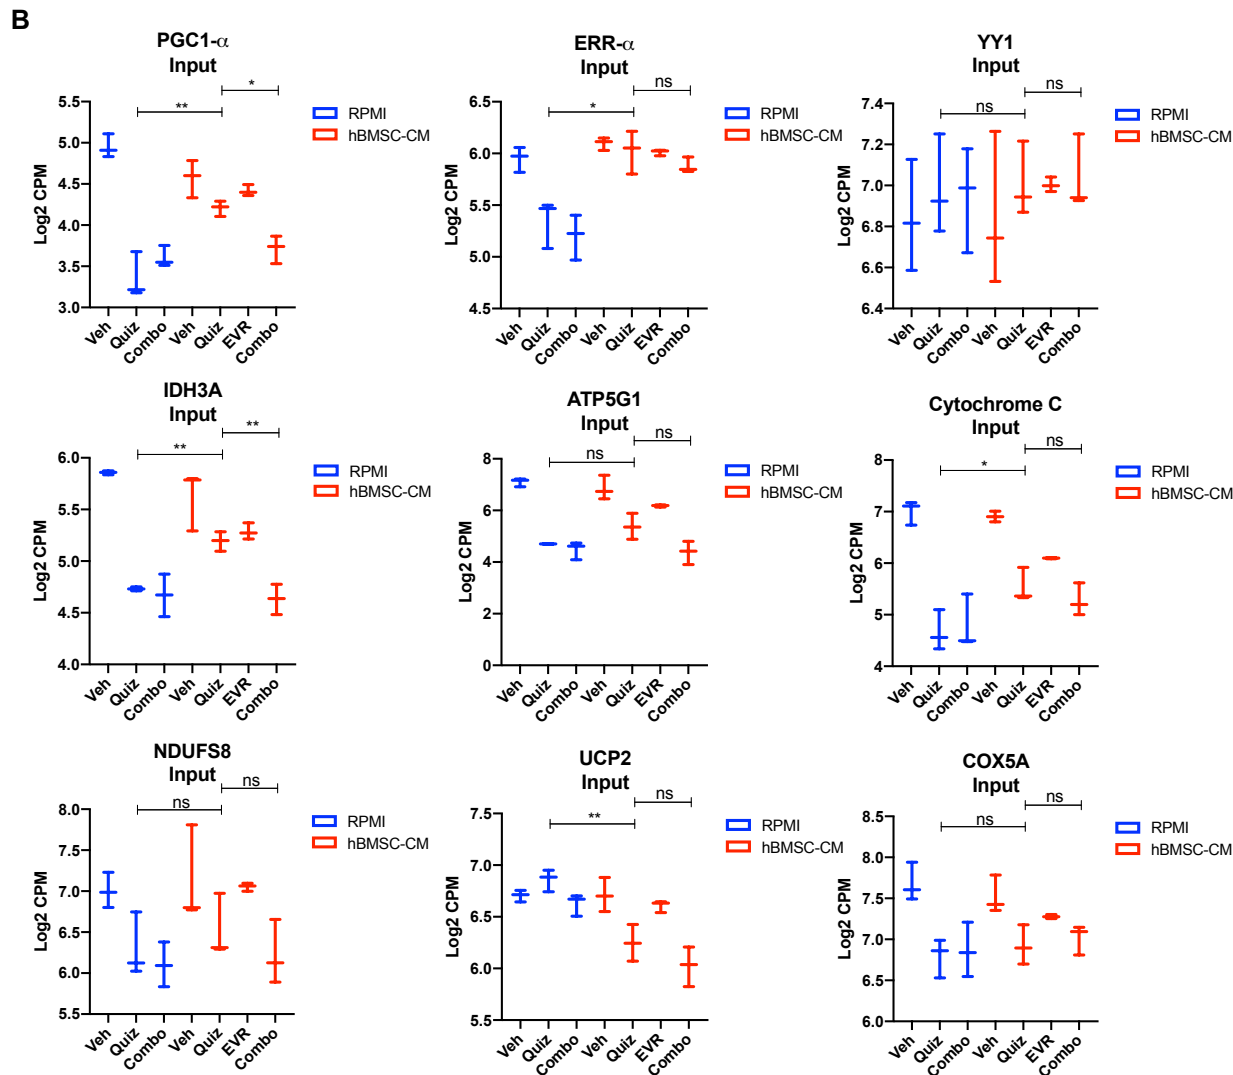

Supplement: supp [file elife-79940-supp-v1.zip]

**Figure 2- figure supplement 3**

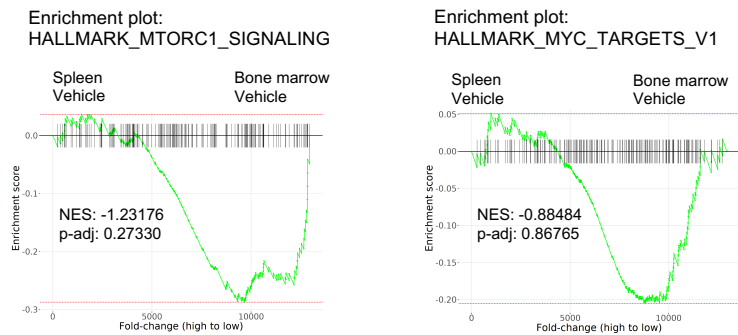

Supplement: supp [file elife-79940-supp-v1.zip]

Figure 7- figure supplement 2

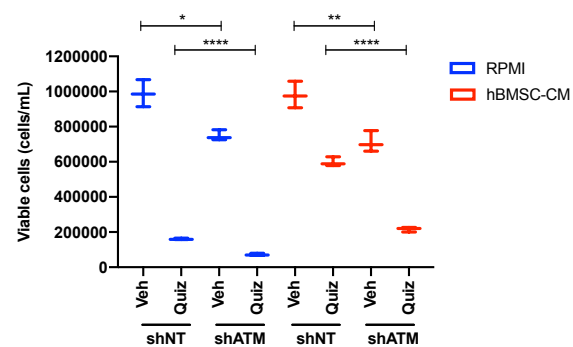

Supplement: supp [file elife-79940-supp-v1.zip]

Figure 3- figure supplement 4

A

AML #2: primary FLT3-ITD+ AML, Relapse  
21 Days of treatment

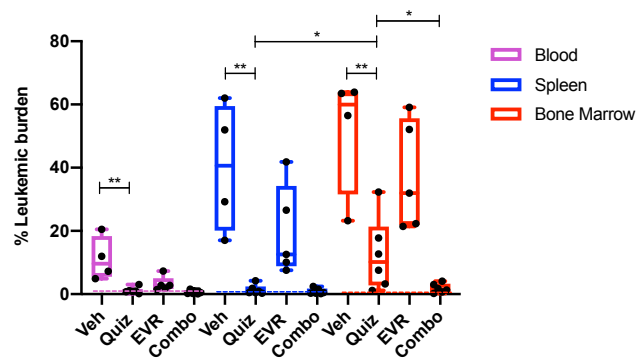

B

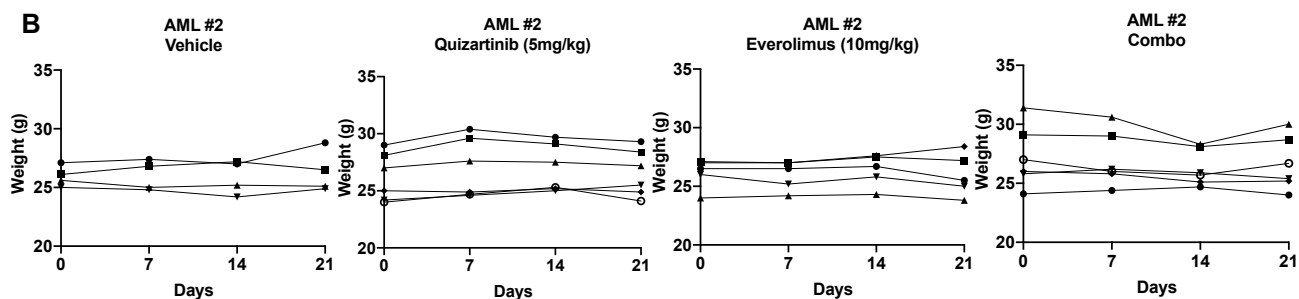

Supplement: supp [file elife-79940-supp-v1.zip]

Figure 2- figure supplement 1

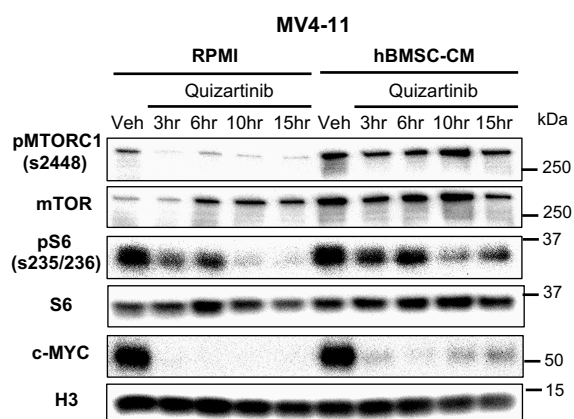

Supplement: supp [file elife-79940-supp-v1.zip]

Figure 4- figure supplement 1

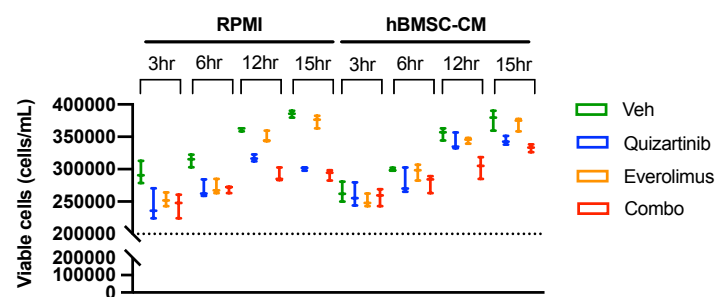

Supplement: supp [file elife-79940-supp-v1.zip]

Figure 5- figure supplement 2

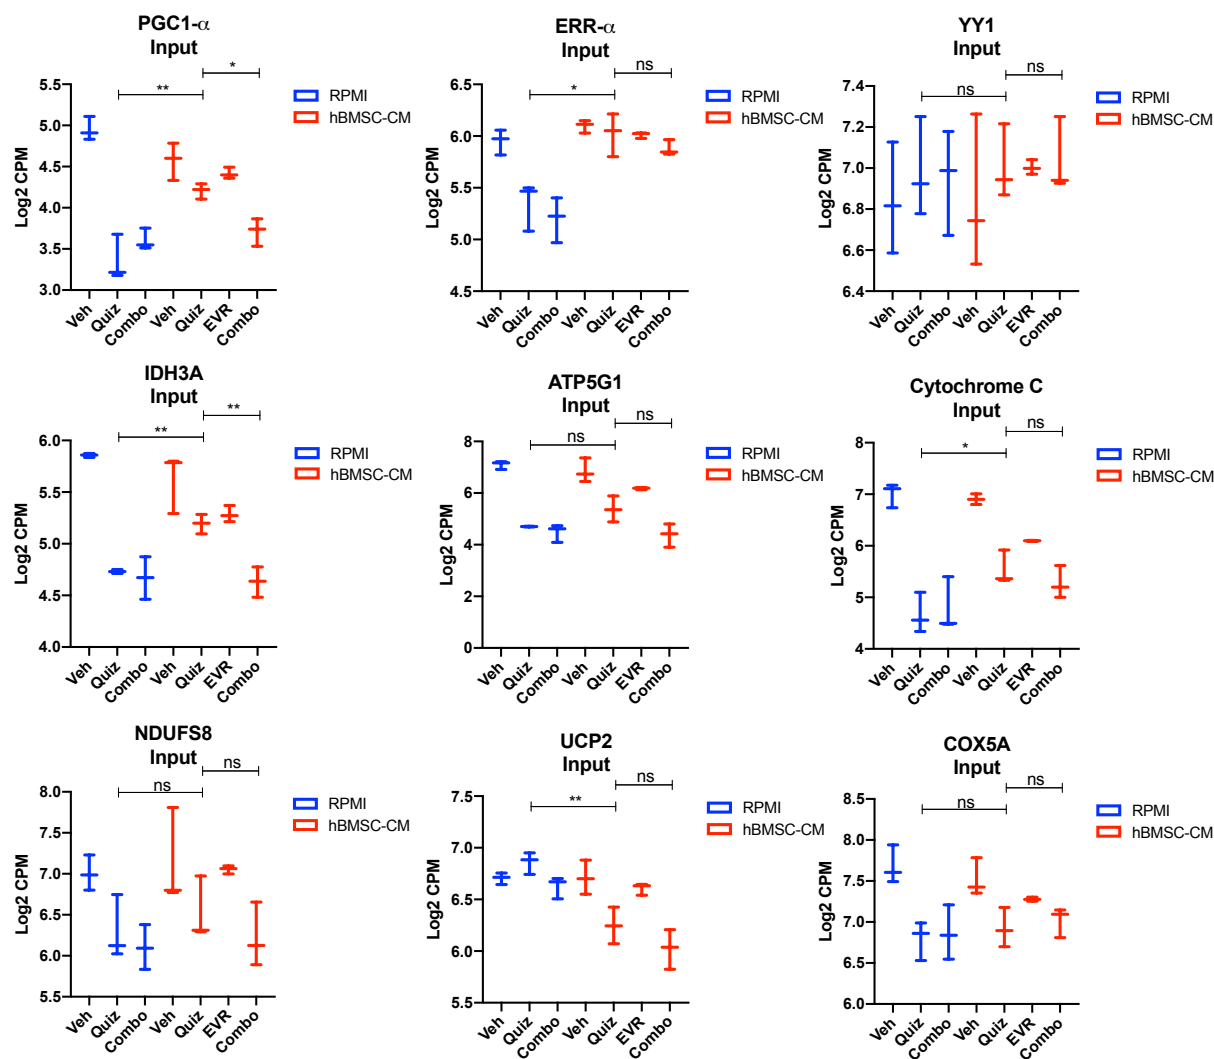

Supplement: supp [file elife-79940-supp-v1.zip]

Figure 7- figure supplement 3

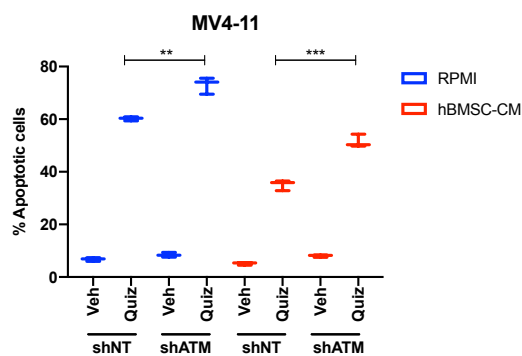

Supplement: supp [file elife-79940-supp-v1.zip]

Figure 3- figure supplement 3

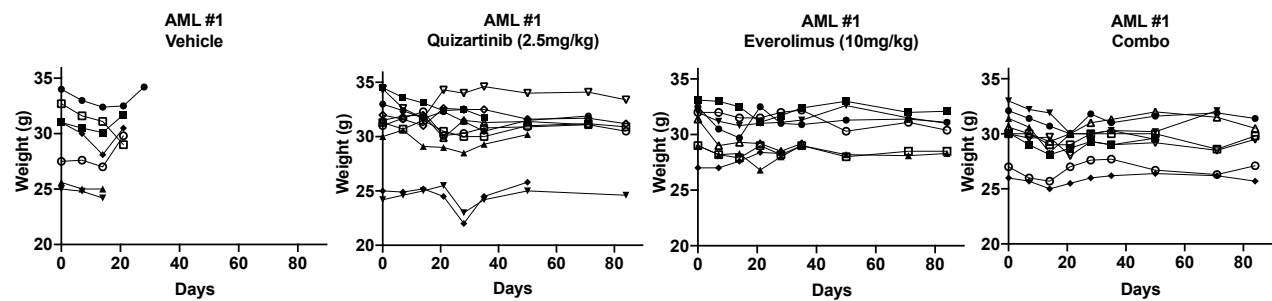

Supplement: supp [file elife-79940-supp-v1.zip]

Figure 7- figure supplement 4

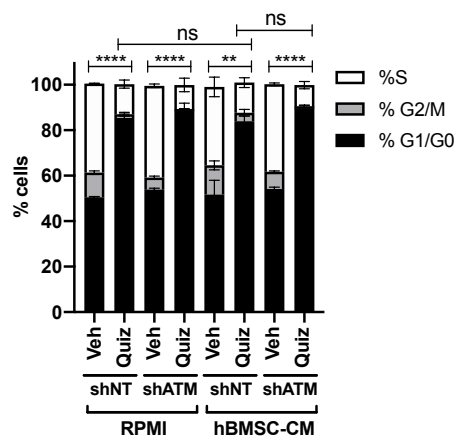

Supplement: supp [file elife-79940-supp-v1.zip]

Figure 1- figure supplement 1

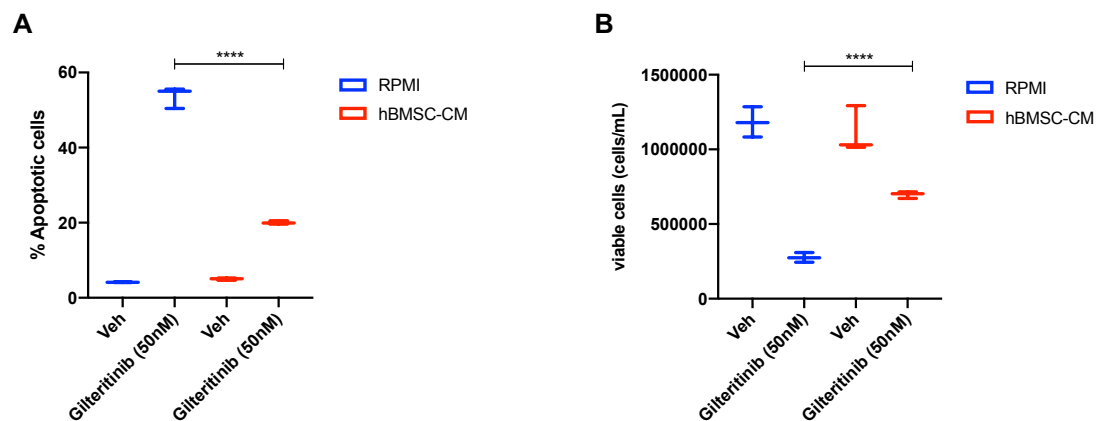

Supplement: supp [file elife-79940-supp-v1.zip]

Figure 1- figure supplement 2

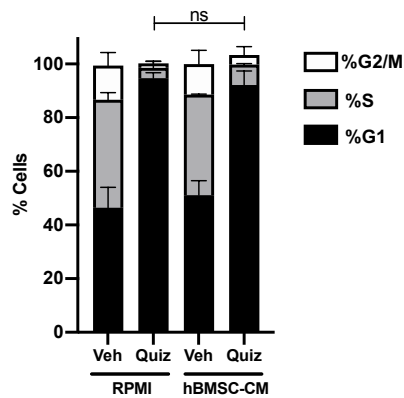

Supplement: supp [file elife-79940-supp-v1.zip]

Figure 4- figure supplement 2

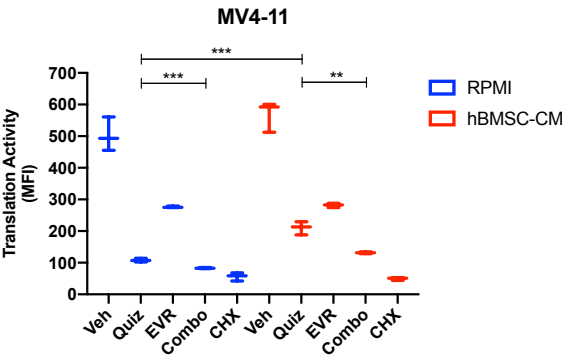

Supplement: supp [file elife-79940-supp-v1.zip]

Figure 4- figure supplement 3

A

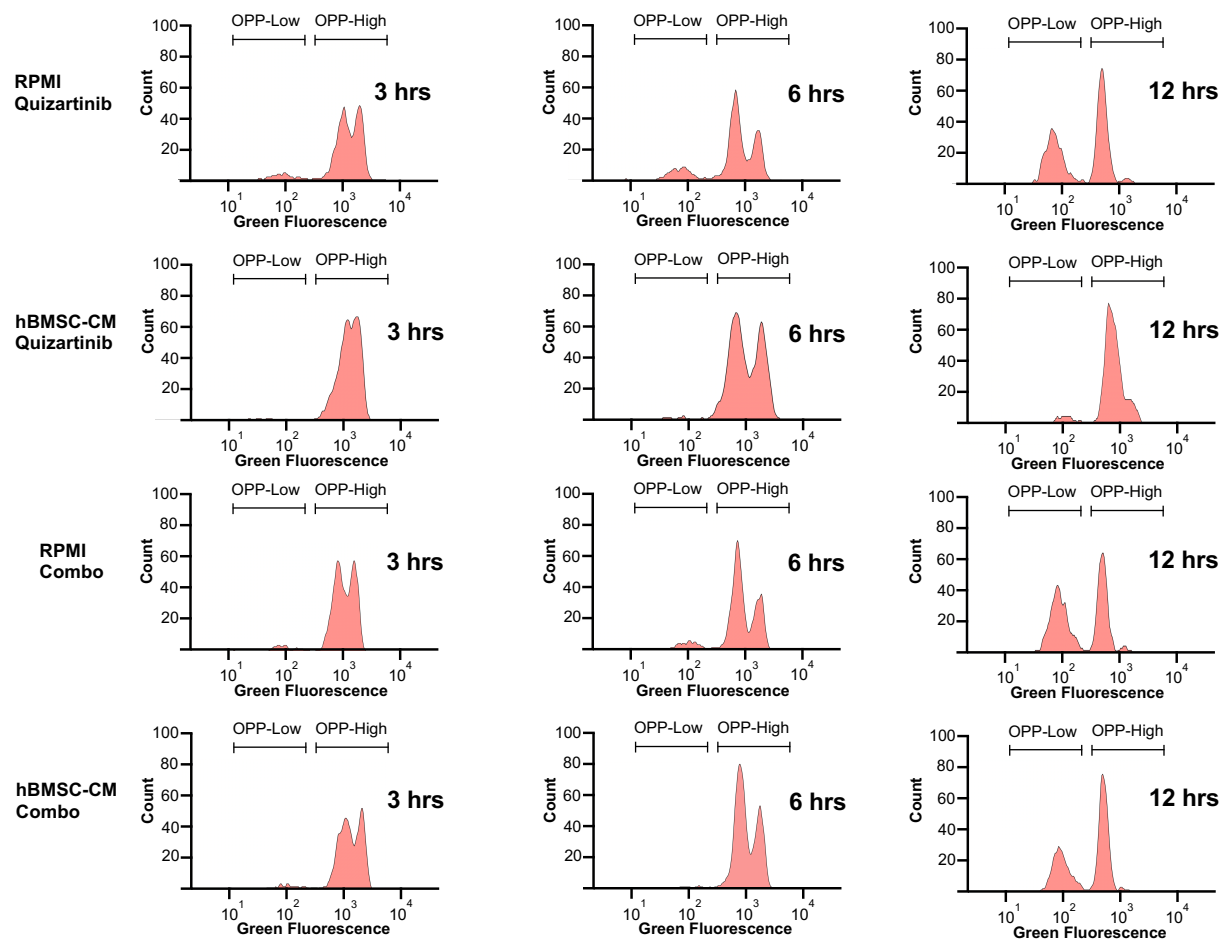

B

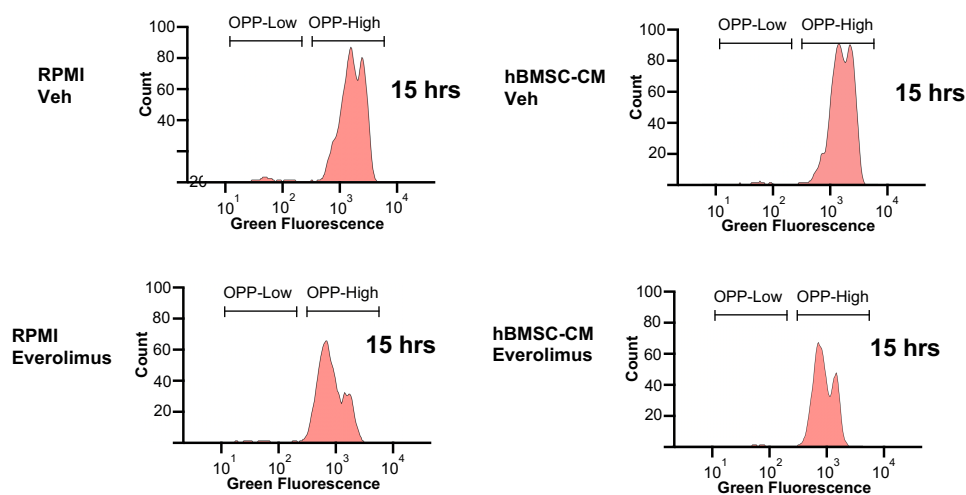

Supplement: supp [file elife-79940-supp-v1.zip]

Figure 2- figure supplement 2

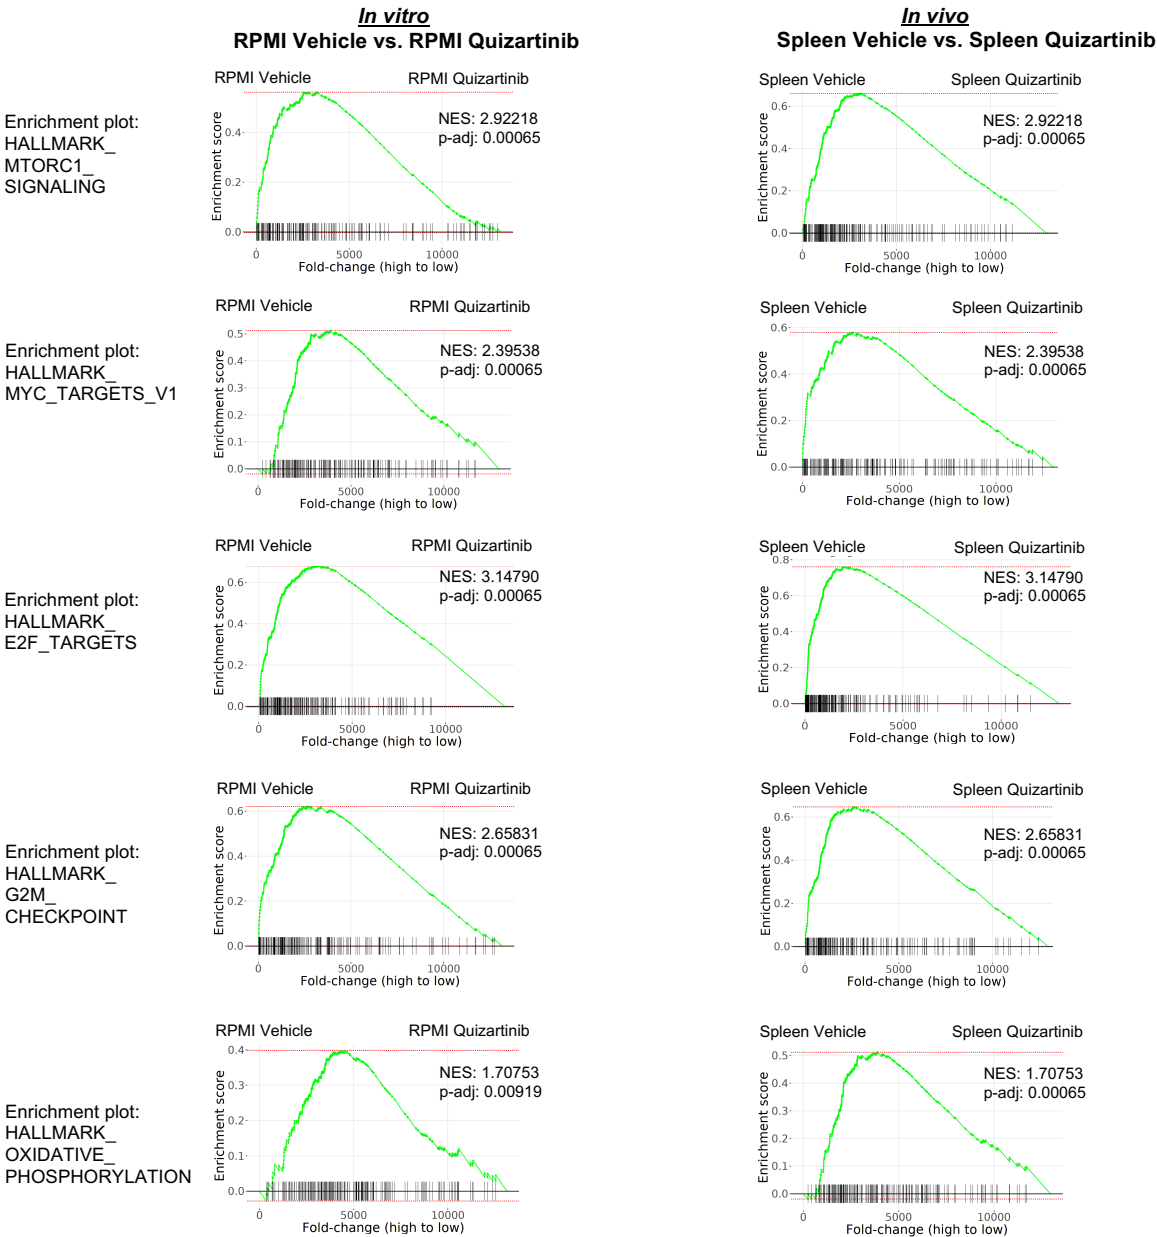

Supplement: supp [file elife-79940-supp-v1.zip]

Figure 3- figure supplement 2

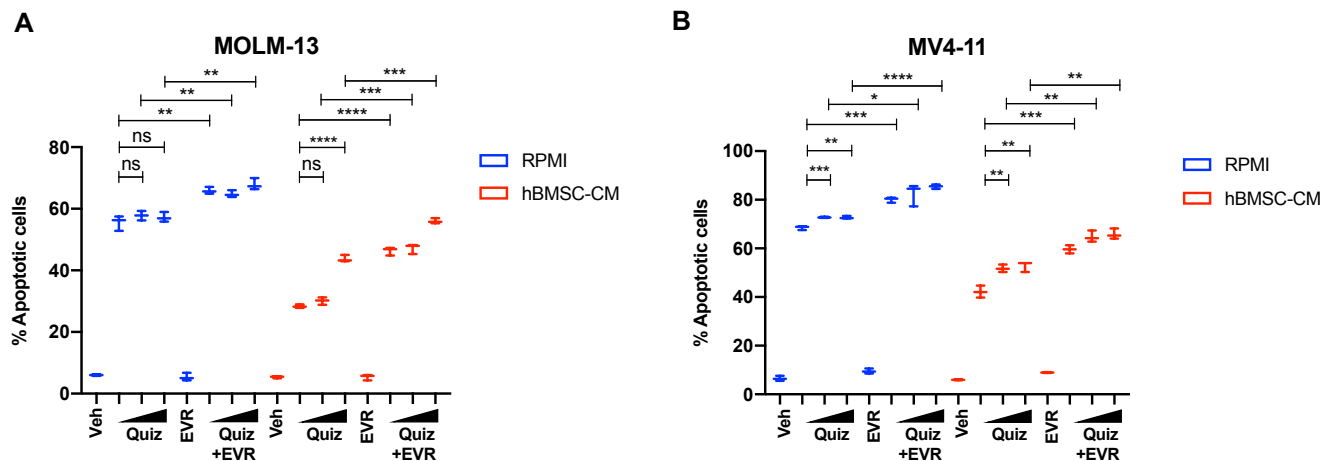

Supplement: supp [file elife-79940-supp-v1.zip]

**Figure 7- figure supplement 6**

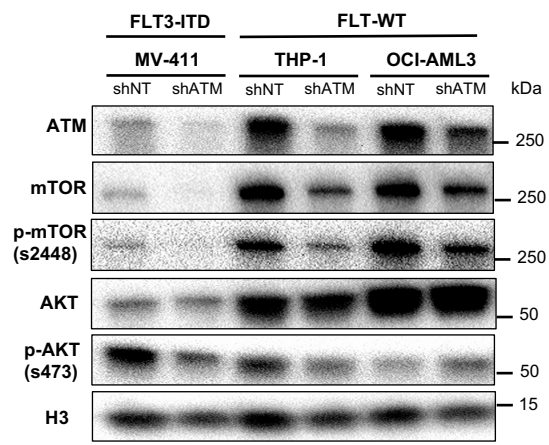

Supplement: supp [file elife-79940-supp-v1.zip]

Figure 1- figure supplement 4

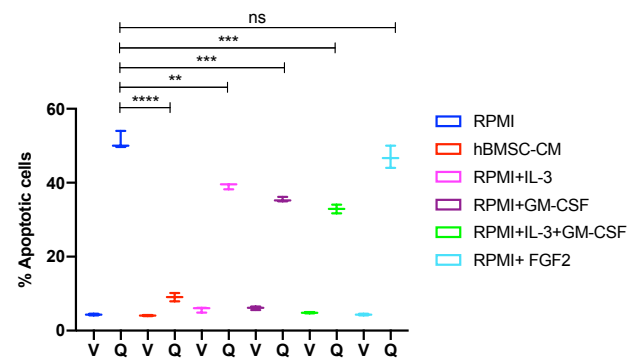

Supplement: supp [file elife-79940-supp-v1.zip]

Figure 1- figure supplement 3

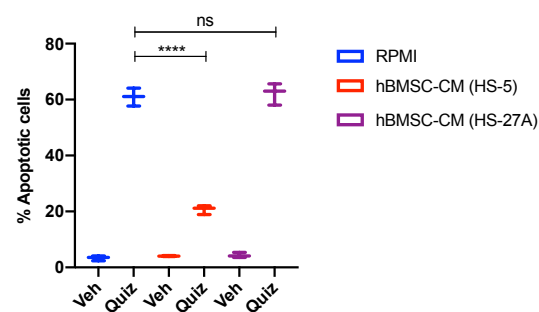

Supplement: supp [file elife-79940-supp-v1.zip]

Figure 7- figure supplement 7

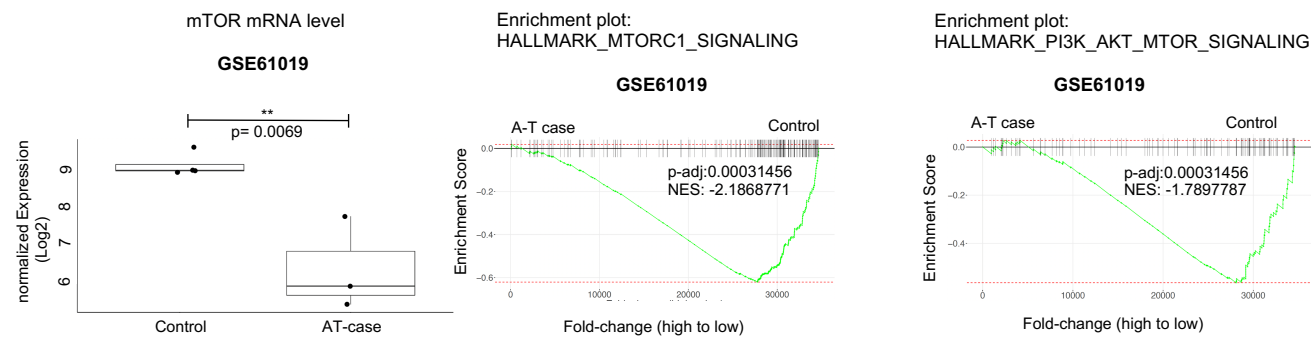

Supplement: supp [file elife-79940-supp-v1.zip]

Figure 7- figure supplement 1

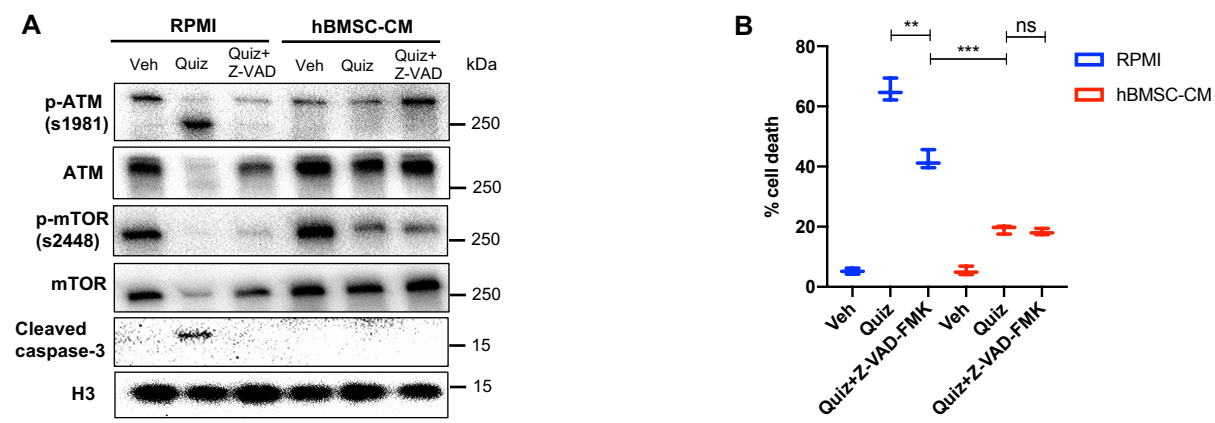

Supplement: supp [file elife-79940-supp-v1.zip]

Figure 3- figure supplement 1

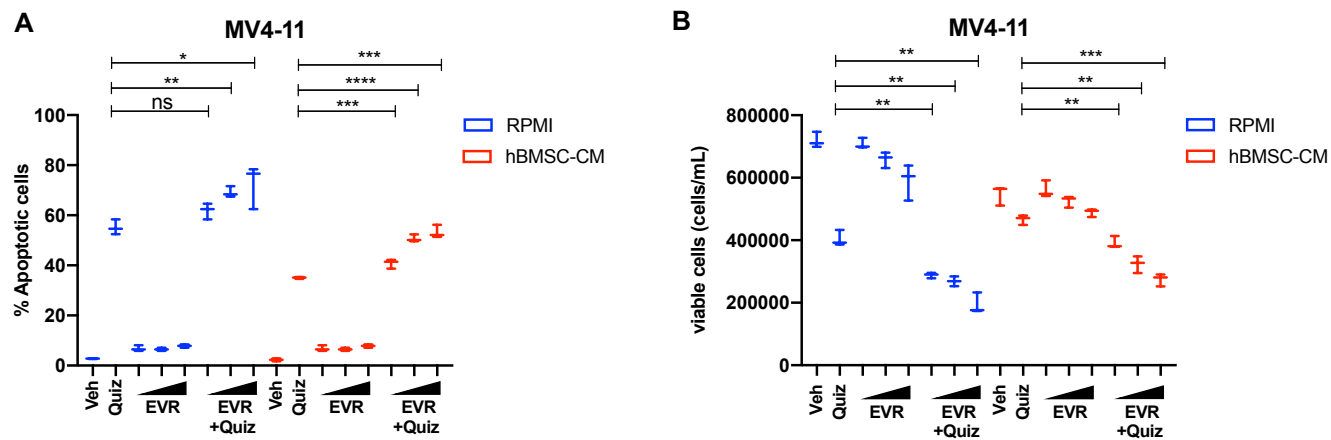

Supplement: supp [file elife-79940-supp-v1.zip]

Figure 7- figure supplement 5

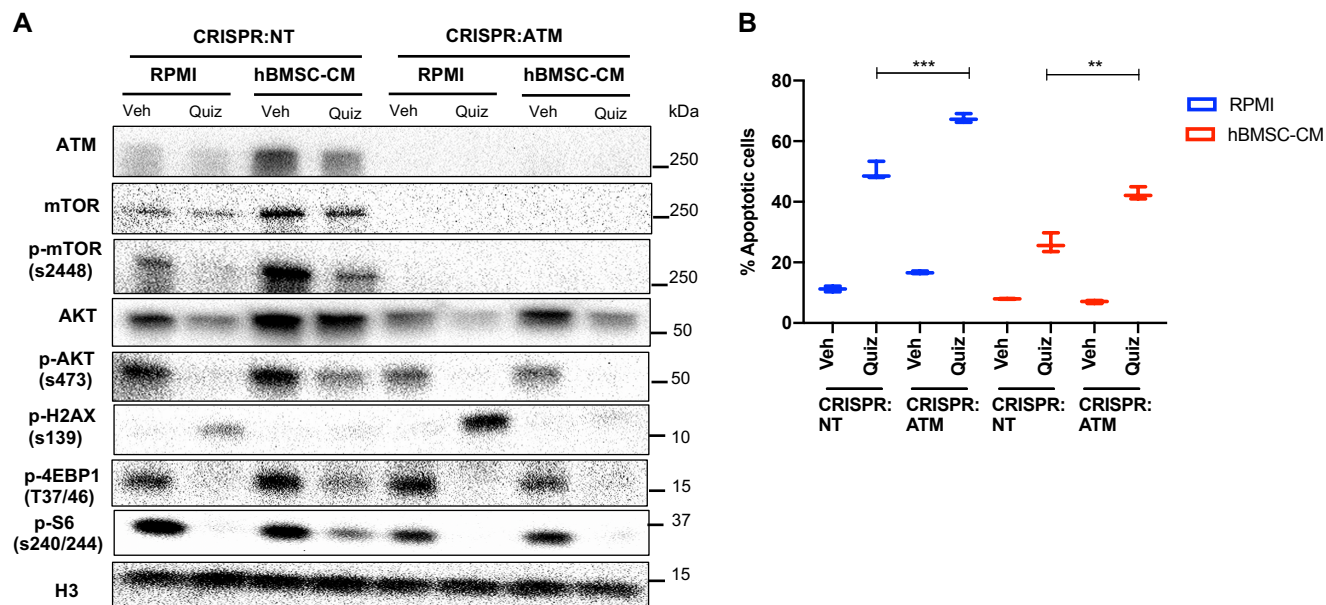

Supplement: supp [file elife-79940-supp-v1.zip]
